# Supplementary material
Source: PubMed Central journal article supplement (PMC4269498)

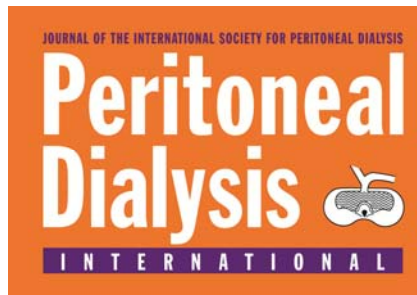

## Supplemental Materials for

### Effect of biocompatible peritoneal dialysis solution on residual renal function: a systematic review of randomized controlled trials

Eun-Young Seo,<sup>1</sup> Sook Hee An,<sup>1\*</sup> Jang-Hee Cho,<sup>2</sup> Hae Sun Suh,<sup>3\*\*</sup> Sun-Hee Park,<sup>2</sup> Hyesun Gwak,<sup>1</sup> Yong-Lim Kim,<sup>2</sup> and Hunjoo Ha<sup>1</sup>

*Graduate School of Pharmaceutical Sciences,<sup>1</sup> College of Pharmacy, Ewha Global Top5 Program, Ewha Womans University, Seoul, Korea; Division of Nephrology and Department of Internal Medicine,<sup>2</sup> Kyungpook National University Hospital, Daegu, Korea; and Research and Development Center,<sup>3</sup> Health Insurance Review and Assessment Service, Seoul, Korea*

*\* Current address of Sook Hee An is Department of Pharmacy, Wonkwang University, Iksan city, Jeonbuk, Korea*

*\*\* Current address of Hae Sun Suh is College of Pharmacy, Pusan National University, Korea*

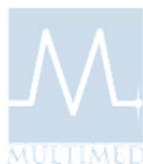

Correspondence to: Hunjoo Ha, Graduate School of Pharmaceutical Sciences, College of Pharmacy,  
Ewha Womans University, 52, Ewhayeodae-gil, Seodaemun-gu, Seoul 120-750, Korea

E-mail: [hha@ewha.ac.kr](mailto:hha@ewha.ac.kr)

OR

Yong-Lim Kim, Division of Nephrology and Department of Internal Medicine, Kyungpook National  
University Hospital, 50, Samduk-dong 2Ga, Jung-gu, Daegu 700-721, Korea

E-mail: [ylkim@knu.ac.kr](mailto:ylkim@knu.ac.kr)

**Supplemental Table 1: Each characteristic of 11 studies included in the systematic review (SR)**

A. Bajo 2011 (44)

|               |                                                                                                                                                                                                                                                                                                  |
|---------------|--------------------------------------------------------------------------------------------------------------------------------------------------------------------------------------------------------------------------------------------------------------------------------------------------|
| Methods       | <p>Country: Spain</p> <p>Setting/Design: RCT, open labeled, multi center trial</p> <p>Time frame: No statement</p> <p>Randomization method: No statement</p> <p>Intention-to-treat: No</p> <p>Follow-up period: 24 months</p> <p>Loss to follow-up: 12/33 (36%)</p>                              |
| Participants  | <p>INCLUSION CRITERIA</p> <p>Incident CAPD patients</p> <p>OVERALL STUDY POPULATION</p> <p>Number: 33 (new PDS : conventional PDS group = 13:20)</p> <p>Age: new PDS group : 62 ± 11 years</p> <p style="padding-left: 40px;">conventional PDS group : 59 ± 15 years</p> <p>Sex (M/F): 19/14</p> |
| Interventions | <p>TREATMENT GROUP</p> <p>Balance® (Fresenius)</p>                                                                                                                                                                                                                                               |

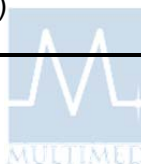

|                  |                                                                                                                                                                                                                                                                                               |
|------------------|-----------------------------------------------------------------------------------------------------------------------------------------------------------------------------------------------------------------------------------------------------------------------------------------------|
|                  | CONTROL GROUP                                                                                                                                                                                                                                                                                 |
|                  | Stay safe <sup>®</sup> (Fresenius)                                                                                                                                                                                                                                                            |
| Outcomes         | <p>1. Primary outcome</p> <p>(1) RRF</p> <p>(2) peritonitis</p> <p>(3) creatinine MTAC</p> <p>(4) ultrafiltration capacity</p> <p>(5) EMT marker</p> <p>2. Secondary outcome</p> <p>(1) technical survival</p> <p>(2) peritonitis</p> <p>3. Check cycle</p> <p>6, 12, 18, 24 months</p>       |
| RRF measurement  | <p>1) Method of measurement: <math>C_{Cr}</math> and <math>C_{urea}</math></p> <p>2) Unit: mL/min</p>                                                                                                                                                                                         |
| Notes            | MTAC: mass transfer area coefficients                                                                                                                                                                                                                                                         |
| B. Cho 2013 (45) |                                                                                                                                                                                                                                                                                               |
| Methods          | <p>Country: Republic of Korea</p> <p>Setting/Design: RCT, open labeled, multi center trial</p> <p>Time frame: April 2001 ~ December 2003</p> <p>Randomization method: No statement</p> <p>Intention-to-treat: No</p> <p>Follow-up period: 12 months</p> <p>Loss to follow-up: 19/79 (24%)</p> |
| Participants     | <p>INCLUSION CRITERIA</p> <p>Incident CAPD patients</p>                                                                                                                                                                                                                                       |

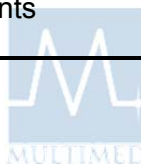

---

OVERALL STUDY POPULATION

Number: 60 (new PDS : conventional PDS group = 32:28)

Age: new PDS group : 51.5 ± 12.8 years

conventional PDS group : 51.1 ± 14.2 years

Sex (M/F): 32/28

---

Interventions TREATMENT GROUP

Balance<sup>®</sup> (Fresenius)

CONTROL GROUP

Stay safe<sup>®</sup> (Fresenius)

---

Outcomes 1. Primary outcome

(1) daily UV, daily UF volume

(2) daily peritoneal glucose absorption

(3) residual renal function, dialysis adequacy

(4) modified 4.25% PET

(5) laboratory blood chemistry, CA125, IL-6

2. Secondary outcome

effluent biomarkers

3. Check cycle

1, 6, 12 months

---

RRF measurement 1) Method of measurement:  $C_{Cr}$  and  $C_{urea}$

2) Unit: mL/min/1.73m<sup>2</sup>

---

Notes UV: urinary volume

UF: ultrafiltration

PET: peritoneal equilibration test

CA125: cancer antigen 125

IL-6: interleukin-6

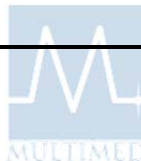

C. Choi 2008 (26)

|               |                                                                                                                                                                                                                                                                                                                  |
|---------------|------------------------------------------------------------------------------------------------------------------------------------------------------------------------------------------------------------------------------------------------------------------------------------------------------------------|
| Methods       | <p>Country: Republic of Korea</p> <p>Setting/Design: RCT, open labeled, single center trial</p> <p>Time frame: No statement</p> <p>Randomization method: No statement</p> <p>Intention-to-treat: No</p> <p>Follow-up period: 12 months</p> <p>Loss to follow-up: 36/104 (35%)</p>                                |
| Participants  | <p>INCLUSION CRITERIA</p> <p>Adults receiving CAPD therapy</p> <p>OVERALL STUDY POPULATION</p> <p>Number: 104 (new PDS : conventional PDS group = 51:53)</p> <p>Age: new PDS group : 52.6 ± 12.4 years</p> <p style="padding-left: 20px;">conventional PDS group : 55.4 ± 11.9 years</p> <p>Sex (M/F): 47/57</p> |
| Interventions | <p>TREATMENT GROUP</p> <p>Balance<sup>®</sup> (Fresenius)</p> <p>CONTROL GROUP</p> <p>Stay safe<sup>®</sup> (Fresenius, Bad Homburg, Germany),</p> <p>Dianeal<sup>®</sup> (Baxter)</p> <p>Perisis<sup>®</sup> (Boryung, Seoul, Republic of Korea)</p>                                                            |
| Outcomes      | <p>1. Primary outcome</p> <p>(1) ratio of dialysate-to-plasma (D/P) creatinine</p> <p>(2) peritoneal ultrafiltration</p> <p>(3) RRF</p> <p>(4) dialysis adequacy indices</p>                                                                                                                                     |

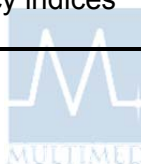

---

|                 |                                                                                                  |
|-----------------|--------------------------------------------------------------------------------------------------|
|                 | (5) effluent CA125                                                                               |
|                 | 2. Check cycle                                                                                   |
|                 | 4, 8, 12 months                                                                                  |
| RRF measurement | 1) Method of measurement: $C_{cr}$ and $C_{urea}$                                                |
|                 | 2) Unit: mL/min                                                                                  |
| Notes           | Patients included who has used the conventional PDS more than 6 months without any complications |
|                 | CAPD: continuous ambulatory peritoneal dialysis                                                  |
|                 | CA125: cancer antigen 125                                                                        |

---

D. Fan 2008 (27)

---

|               |                                                       |
|---------------|-------------------------------------------------------|
| Methods       | Country: United Kingdom                               |
|               | Setting/Design: RCT, open labeled                     |
|               | Time frame: January 2004 to December 2005             |
|               | Randomization method: No statement                    |
|               | Intention-to-treat: Yes                               |
|               | Follow-up period: 12 months                           |
|               | Loss to follow-up: 25/118 (21%)                       |
| Participants  | INCLUSION CRITERIA                                    |
|               | Adults receiving CAPD therapy                         |
|               | OVERALL STUDY POPULATION                              |
|               | Number: 118 (new PDS : conventional PDS group =57:61) |
|               | Age: new PDS group : $51.6 \pm 2.0$ years             |
|               | conventional PDS group : $54.2 \pm 1.9$ years         |
|               | Sex (M/F): 47/57                                      |
| Interventions | TREATMENT GROUP                                       |

---

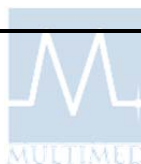

|                         |                                                                                                                                                                                                                                               |
|-------------------------|-----------------------------------------------------------------------------------------------------------------------------------------------------------------------------------------------------------------------------------------------|
|                         | Balance <sup>®</sup> (Fresenius), Physioneal <sup>®</sup> (Baxter)<br>CONTROL GROUP<br>Stay safe <sup>®</sup> (Fresenius, Bad Homburg, Germany),<br>Dianeal <sup>®</sup> (Baxter)                                                             |
| Outcomes                | 1. Primary outcome<br>RRF<br>2. Secondary outcome<br>(1) peritonitis rate<br>(2) PD technique survival<br>(3) Changes in peritoneal membrane function assessed by PET<br>(4) Biomarker of inflammation, CRP<br>3. Check cycle<br>3, 12 months |
| RRF measurement         | 1) Method of measurement: Mean of C <sub>cr</sub> and C <sub>urea</sub><br>2) Unit: L/week/1.73m <sup>2</sup>                                                                                                                                 |
| Notes                   | PET: peritoneal equilibrium test<br>CRP: C-reactive protein<br>APD: automated peritoneal dialysis<br>New PDS group : 23 CAPD, 34 APD patients<br>Conventional PDS group: 24 CAPD, 37 APD patients                                             |
| E. Haag-Weber 2010 (24) |                                                                                                                                                                                                                                               |
| Methods                 | Country: Germany, France, Austria<br>Setting/Design: RCT, open labeled, multicenter trial<br>Time frame: 1999 to 2005<br>Randomization method: No statement<br>Intention-to-treat: No                                                         |

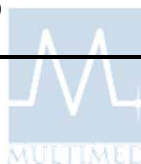

---

|                 |                                                                                                                                                                                                                                                                   |
|-----------------|-------------------------------------------------------------------------------------------------------------------------------------------------------------------------------------------------------------------------------------------------------------------|
|                 | Follow-up period: 18 months                                                                                                                                                                                                                                       |
|                 | Loss to follow-up: 30/69 (35%)                                                                                                                                                                                                                                    |
| Participants    | <b>INCLUSION CRITERIA</b><br>Adults receiving CAPD therapy<br><b>OVERALL STUDY POPULATION</b><br>Number: 69 (new PDS : conventional PDS group =43:26)<br>Age: new PDS group : 52.6 ± 12.4 years<br>conventional PDS group : 55.4 ± 11.9 years<br>Sex (M/F): 40/29 |
| Interventions   | <b>TREATMENT GROUP</b><br>Gambrosol trio® (Gambro AB, Lund, Sweden)<br><b>CONTROL GROUP</b><br>Gambrosol® (Gambro),<br>Stay safe® (Fresenius, Bad Homburg, Germany),<br>Dianeal® (Baxter, Unterschleißheim, Germany)                                              |
| Outcomes        | 1. Primary outcome<br>(1) RRF<br>(2) fluid balance<br>(3) CRP, albumin<br>(4) phosphate, calcium<br>(5) CA125<br>(6) membrane transport<br>(7) peritonitis episodes<br>2. Check cycle<br>Every 4 to 6 week                                                        |
| RRF measurement | 1) Method of measurement: Mean of C <sub>cr</sub> and C <sub>urea</sub>                                                                                                                                                                                           |

---

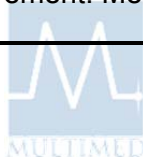



|                      |                                                                                                                                                                                                                                                                                                       |
|----------------------|-------------------------------------------------------------------------------------------------------------------------------------------------------------------------------------------------------------------------------------------------------------------------------------------------------|
|                      | 2) Unit: mL/min/1.73m <sup>2</sup>                                                                                                                                                                                                                                                                    |
| Notes                | <p>Patients included who has GFR ≥ 3mL/min or Ccr ≥6mL/min</p> <p>Patients excluded who were pregnant or lactating or had several peritonitis episodes in the past or cancer.</p>                                                                                                                     |
| F. Johnson 2012 (30) |                                                                                                                                                                                                                                                                                                       |
| Methods              | <p>Country: Australia, Singapore, New Zealand</p> <p>Setting/Design: RCT, open labeled, multi center trial</p> <p>Time frame: No statement (2 years)</p> <p>Randomization method: Yes</p> <p>Intention-to-treat: Yes</p> <p>Follow-up period: 12, 24 months</p> <p>Loss to follow-up: 15/182 (8%)</p> |
| Participants         | <p>INCLUSION CRITERIA</p> <p>ESRD patients with RRF ≥5</p> <p>OVERALL STUDY POPULATION</p> <p>Number: 167 (new PDS : conventional PDS group =85:82)</p> <p>Age: new PDS group : 59.3 years</p> <p style="padding-left: 40px;">conventional PDS group : 57.9 years</p> <p>Sex (M/F): 100/82</p>        |
| Interventions        | <p>TREATMENT GROUP</p> <p>Balance<sup>®</sup> (Fresenius)</p> <p>CONTROL GROUP</p> <p>Stay safe<sup>®</sup> (Fresenius)</p>                                                                                                                                                                           |
| Outcomes             | <p>1. Primary outcome</p> <p>Slope of renal function decline</p> <p>2. Secondary outcome</p>                                                                                                                                                                                                          |

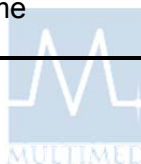

- 
- (1) time to anuria
  - (2) fluid volume status
  - (3) peritonitis-free survival
  - (4) technique survival
  - (5) patient survival and adverse events
3. Check cycle
- 3, 6, 9, 12, 18, 24 months

---

RRF measurement

- 1) Method of measurement: Mean of  $C_{cr}$  and  $C_{urea}$
- 2) Unit: mL/min/1.73m<sup>2</sup>

---



G. Kim 2009 (25) and Kim 2012 (28)

|               |                                                                                                                                                                                                                                                                                                                    |
|---------------|--------------------------------------------------------------------------------------------------------------------------------------------------------------------------------------------------------------------------------------------------------------------------------------------------------------------|
| Methods       | <p>Country: Republic of Korea</p> <p>Setting/Design: RCT, open labeled, multicenter trial</p> <p>Time frame: June 2004 to May 2006</p> <p>Randomization method: No statement</p> <p>Intention-to-treat: Yes</p> <p>Follow-up period: 12 months</p> <p>Loss to follow-up: 22/91 (24%)</p>                           |
| Participants  | <p>INCLUSION CRITERIA</p> <p>Adults receiving CAPD therapy</p> <p>OVERALL STUDY POPULATION</p> <p>Number: 91 (new PDS : conventional PDS group =48:43)</p> <p>Age: new PDS group : 52.6 ± 12.4 years</p> <p style="padding-left: 20px;">conventional PDS group : 55.4 ± 11.9 years</p> <p>Sex (M/F): 55/36</p>     |
| Interventions | <p>TREATMENT GROUP</p> <p>Balance<sup>®</sup> (Fresenius)</p> <p>CONTROL GROUP</p> <p>Stay safe<sup>®</sup> (Fresenius, Bad Homburg, Germany)</p>                                                                                                                                                                  |
| Outcomes      | <p>1. Primary outcome</p> <p style="padding-left: 20px;">GFR(glomerular filtration rate)</p> <p>2. Secondary outcome</p> <p style="padding-left: 20px;">(1) urine volume</p> <p style="padding-left: 20px;">(2) survival</p> <p style="padding-left: 20px;">(3) clinical laboratory data</p> <p>2. Check cycle</p> |

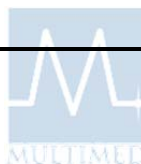

---

|                 |                                                                                                 |
|-----------------|-------------------------------------------------------------------------------------------------|
|                 | 6, 12 months / 24 months                                                                        |
| RRF measurement | 1) Method of measurement: Mean of $C_{cr}$ and $C_{urea}$<br>2) Unit: L/week/1.73m <sup>2</sup> |
| Notes           | Analysis by the mixed model with adjustments for age, gender, Davies score and GFR at Month 1   |

---



H. Lai 2012 (29)

|               |                                                                                                                                                                                                                                                                                                                                           |
|---------------|-------------------------------------------------------------------------------------------------------------------------------------------------------------------------------------------------------------------------------------------------------------------------------------------------------------------------------------------|
| Methods       | <p>Country: Hong Kong</p> <p>Setting/Design: RCT, open labeled, multicenter trial</p> <p>Time frame: Start (July 2003 to 2005), 30 months + 12~16 months</p> <p>Randomization method: No statement</p> <p>Intention-to-treat: Yes</p> <p>Follow-up period: 30+12~16 months (average 45 months)</p> <p>Loss to follow-up: 25/125 (20%)</p> |
| Participants  | <p>INCLUSION CRITERIA</p> <p>Adults receiving CAPD therapy</p> <p>OVERALL STUDY POPULATION</p> <p>Number: 125 (new PDS : conventional PDS group =58:67)</p> <p>Age: new PDS group : 58.6 years<br/>               conventional PDS group : 61.9 years</p> <p>Sex (M/F): 69/56</p>                                                         |
| Interventions | <p>TREATMENT GROUP</p> <p>Balance<sup>®</sup> (Fresenius)</p> <p>Gambrosol trio<sup>®</sup> (Gambro AB)</p> <p>Physioneal<sup>®</sup> (Baxter)</p> <p>CONTROL GROUP</p> <p>ANDY-Disc<sup>®</sup> (Fresenius)</p> <p>Dianeal<sup>®</sup> (Baxter)</p>                                                                                      |
| Outcomes      | <p>1. Co-primary outcome</p> <p>(1) cytokines</p> <p>(2) growth factor</p>                                                                                                                                                                                                                                                                |

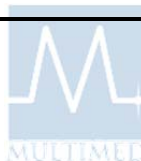

---

(3) adipokine

(4) cardiac biomarker

(5) GFR(RRF)

(6) urine output

2. Check cycle

15 months

---

RRF measurement 1) Method of measurement: Mean of  $C_{cr}$  and  $C_{urea}$

2) Unit: mL/min/1.73m<sup>2</sup>

---



I. Park 2012 (23)

|               |                                                                                                                                                                                                                                                                                                         |
|---------------|---------------------------------------------------------------------------------------------------------------------------------------------------------------------------------------------------------------------------------------------------------------------------------------------------------|
| Methods       | <p>Country: Republic of Korea</p> <p>Setting/Design: RCT, open labeled, multicenter trial</p> <p>Time frame: October 2005 to April 2007</p> <p>Randomization method: No statement</p> <p>Intention-to-treat: No statement</p> <p>Follow-up period: 12 months</p> <p>Loss to follow-up: 35/146 (24%)</p> |
| Participants  | <p>INCLUSION CRITERIA</p> <p>Adults receiving CAPD therapy</p> <p>OVERALL STUDY POPULATION</p> <p>Number: 146 (new PDS : conventional PDS group =79:67)</p> <p>Age: new PDS group : 52.2 ± 11.4 years<br/>               conventional PDS group : 52.6 ± 11.1 years</p> <p>Sex (M/F): 67/79</p>         |
| Interventions | <p>TREATMENT GROUP</p> <p>Balance<sup>®</sup> (Fresenius)</p> <p>CONTROL GROUP</p> <p>Stay safe<sup>®</sup> (Fresenius)</p>                                                                                                                                                                             |
| Outcomes      | <p>1. Primary outcome</p> <p>(1) IEDI</p> <p>(2) composite score</p> <p>2. Secondary outcome</p> <p>(1) sICAM-1</p> <p>(2) sVCAM-1</p> <p>(3) RRF</p>                                                                                                                                                   |



|                    |                                                                                                                                                                                                                                                             |
|--------------------|-------------------------------------------------------------------------------------------------------------------------------------------------------------------------------------------------------------------------------------------------------------|
|                    | (4) Characteristics of peritoneal membrane transport<br>(5) ultrafiltration volume<br>(6) nutritional parameter<br>3. Check cycle<br>6, 12 months                                                                                                           |
| RRF measurement    | 1) Method of measurement: Mean of $C_{cr}$ and $C_{urea}$<br>2) Unit: mL/min                                                                                                                                                                                |
| Notes              | IEDI: inflammation and endothelial dysfunction<br>sICAM: soluble intercellular adhesion molecule<br>sVCAM: soluble vascular cellular adhesion molecule                                                                                                      |
| J. Szeto 2007 (21) |                                                                                                                                                                                                                                                             |
| Methods            | Country: Hong Kong, China<br>Setting/Design: RCT<br>Time frame: No statement<br>Randomization method: Yes<br>Intention-to-treat: No statement<br>Follow-up period: 12 months<br>Loss to follow-up: 2/50 (4%)                                                |
| Participants       | INCLUSION CRITERIA<br>Adults receiving CAPD therapy<br>OVERALL STUDY POPULATION<br>Number: 50 (new PDS : conventional PDS group =25:25)<br>Age: new PDS group : $60.9 \pm 11.2$ years<br>conventional PDS group : $55.0 \pm 13.7$ years<br>Sex (M/F): 30/20 |
| Interventions      | TREATMENT GROUP                                                                                                                                                                                                                                             |

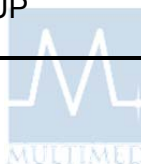



|                       |                                                                                                                                                                                                                                                                                                                                                                       |
|-----------------------|-----------------------------------------------------------------------------------------------------------------------------------------------------------------------------------------------------------------------------------------------------------------------------------------------------------------------------------------------------------------------|
|                       | Balance <sup>®</sup> (Fresenius, Germany)                                                                                                                                                                                                                                                                                                                             |
|                       | CONTROL GROUP                                                                                                                                                                                                                                                                                                                                                         |
|                       | Stay safe <sup>®</sup> (Fresenius)                                                                                                                                                                                                                                                                                                                                    |
| Outcomes              | <p>1. Primary outcome</p> <p>(1) peritoneal transport</p> <p>(2) serum inflammatory marker</p> <p>(3) PDE</p> <p>2. Secondary outcome</p> <p>(1) nutritional and adequacy indices</p> <p>(2) RRF</p> <p>(3) peritonitis-free survival</p> <p>(4) hospitalization and actuarial and technique survival</p> <p>2. Check cycle</p> <p>4, 8, 16, 24, 32, 40, 52 weeks</p> |
| RRF measurement       | <p>1) Method of measurement: Mean of <math>C_{cr}</math> and <math>C_{urea}</math></p> <p>2) Unit: mL/min/1.73m<sup>2</sup></p>                                                                                                                                                                                                                                       |
| Notes                 | <p>Patients excluded who were unlikely to survive, planned to have elective living-related kidney transplant or transfer to other renal center within 6 months.</p> <p>PDE: PD effluent</p>                                                                                                                                                                           |
| K. Williams 2004 (22) |                                                                                                                                                                                                                                                                                                                                                                       |
| Methods               | <p>Country: 11 countries in Europe</p> <p>Setting/Design: RCT, open labeled, multicenter trial, cross-over study</p> <p>Time frame: No statement</p> <p>Randomization method: No statement</p>                                                                                                                                                                        |

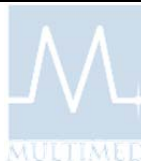

---

|                 |                                                                                                                                                                                                                                                                 |
|-----------------|-----------------------------------------------------------------------------------------------------------------------------------------------------------------------------------------------------------------------------------------------------------------|
|                 | Intention-to-treat: No                                                                                                                                                                                                                                          |
|                 | Follow-up period: 6 months (Phase I : 3 months)                                                                                                                                                                                                                 |
|                 | Loss to follow-up: 13/73 (18%)                                                                                                                                                                                                                                  |
| Participants    | <b>INCLUSION CRITERIA</b><br>Adults receiving CAPD therapy<br><b>OVERALL STUDY POPULATION</b><br>Number: 71 (new PDS : conventional PDS group =36:35)<br>Age: new PDS group : 61 (46-68) years<br>conventional PDS group : 57 (51-71) years<br>Sex (M/F): 42/29 |
| Interventions   | <b>TREATMENT GROUP</b><br>Balance® (Fresenius)<br><b>CONTROL GROUP</b><br>Stay safe® (Fresenius, Bad Homburg, Germany)                                                                                                                                          |
| Outcomes        | 1. Primary outcome<br>(1) CA125<br>2. Secondary outcome<br>(1) AGE (CML, imidazolone in serum and dialysate)<br>(2) Hyaluronic acid<br>(3) PICP<br>(4) VEGF, TNF alpha, tolerability<br>(5) RRF<br>3. Check cycle<br>12, 24 weeks                               |
| RRF measurement | 1) Method of measurement: Median of $C_{cr}$ and $C_{urea}$<br>2) Unit: L/day                                                                                                                                                                                   |

---

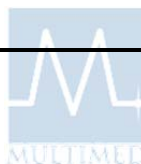

---

Notes

Results are reported as median (range).

Data at the end of treatment Phase I were extracted considering residual initial PDS effect, because this study has cross-over design.

PICP: procollagen I peptide

---



**Supplemental Figure 1: Results of study quality for validity used in this systematic review (Risk of bias summary from Review Manager (Revman 2011; Version 5.1))**

|                  | Random sequence generation (selection bias) | Allocation concealment (selection bias) | Blinding of participants and personnel (performance bias) | Blinding of outcome assessment (detection bias) | Incomplete outcome data (attrition bias) | Selective reporting (reporting bias) | Other bias |
|------------------|---------------------------------------------|-----------------------------------------|-----------------------------------------------------------|-------------------------------------------------|------------------------------------------|--------------------------------------|------------|
| Bajo 2011        | ?                                           | ?                                       | +                                                         | +                                               | ●                                        | +                                    | ●          |
| Cho 2013         | ?                                           | ?                                       | +                                                         | +                                               | +                                        | +                                    | +          |
| Choi 2008        | ?                                           | ?                                       | +                                                         | +                                               | ●                                        | +                                    | +          |
| Fan 2008         | ?                                           | ?                                       | +                                                         | +                                               | +                                        | +                                    | +          |
| Haag-Webeer 2010 | +                                           | ?                                       | +                                                         | +                                               | ●                                        | +                                    | +          |
| Johnson 2012     | +                                           | +                                       | +                                                         | +                                               | +                                        | +                                    | +          |
| Kim 2012         | ?                                           | ?                                       | +                                                         | +                                               | +                                        | +                                    | +          |
| Lai 2012         | +                                           | ?                                       | +                                                         | +                                               | +                                        | +                                    | +          |
| Park 2012        | ?                                           | +                                       | +                                                         | +                                               | ?                                        | +                                    | +          |
| Szeto 2007       | +                                           | +                                       | +                                                         | +                                               | ?                                        | +                                    | +          |
| Williams 2004    | ?                                           | ?                                       | +                                                         | +                                               | ●                                        | +                                    | +          |

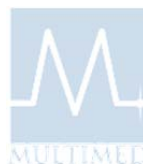

Supplement: supp_2012.00331_Supplemental_Materials.pdf [file supp_2012.00331_Supplemental_Materials.pdf]
